# Supplementary material
Source: Springer Nature journal article supplement (https://www.springermedizin.de/resource/supplementary/12967_2009_383_MOESM6_ESM.pdf/9576352)

# Donor 19 (HLA-A\*0203/2402)

E:T ratio, Target cell

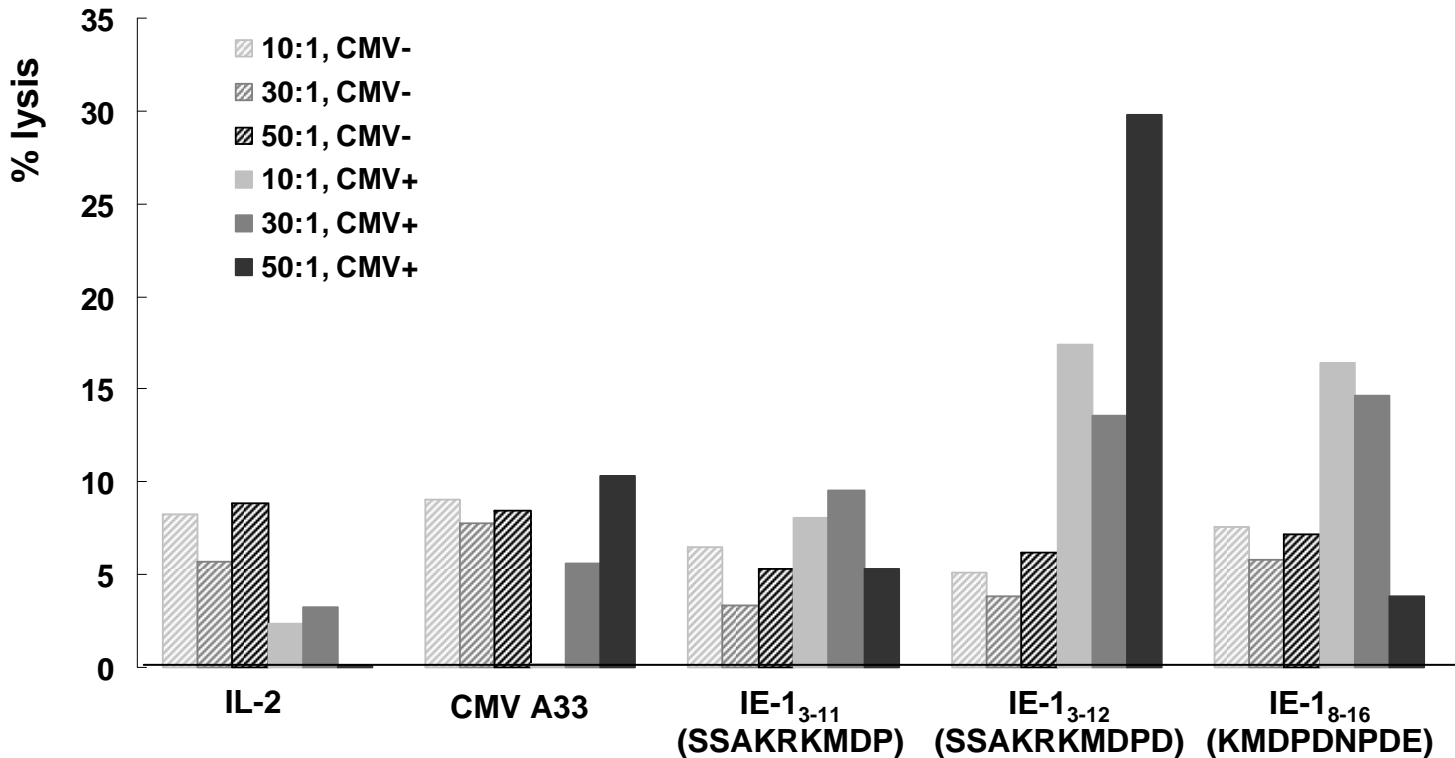

Supplement: MOESM6 [file 9576352]
